# Supplementary material
Source: publisher figshare collection journal article supplement (https://scielo.figshare.com/articles/dataset/_/7591349)
Supplement: Supplementary file 1 [file Table_1.xls]

## Sheet: Table_1
<b>Variável</b>	<b>N</b>	<b>%</b>
Idade
De 18 a 20 anos	151	26,22
De 21 a 25 anos	337	58,51
De 26 a 30 anos	52	9,03
31 anos ou mais	33	5,73
Sexo
Feminino	338	58,68
Masculino	237	41,15
Cor/raça
Amarelo	34	5,90
Branco	499	86,63
Indígena	1	0,17
Negro	11	1,91
Pardo	30	5,21
Série do curso
Primeira	155	26,91
Segunda	106	18,40
Terceira	134	23,26
Quarta	78	13,54
Quinta	60	10,42
Sexta	43	7,47
Estado civil
Casado	21	3,65
Divorciado	3	0,52
Solteiro	549	95,31
Viúvo	2	0,35
Tipo de escola no ensino médio
Privada	482	83,68
Pública	58	10
Parcialmente privada	32	5,56
Outra	1	0,17
Local de moradia
Amigos	99	17,19
Pai	114	19,79
Pensionato	8	1,39
Sozinho	309	53,65
Outro	46	7,99
Escolaridade do pai (anos)
Nenhuma	1	0,17
De 1 a 3	1	0,17
De 4 a 7	37	6,42
De 8 a 11	111	19,27
12 ou mais	424	73,61
Escolaridade da mãe (anos)
Nenhuma	2	0,35
De 1 a 3	3	0,52
De 4 a 7	20	3,47
De 8 a 11	67	11,63
12 ou mais	482	83,68
