# Supplementary material
Source: publisher figshare collection journal article supplement (https://scielo.figshare.com/articles/dataset/_/7591349)
Supplement: Supplementary file 2 [file Table_2.xls]

## Sheet: Table_2
<b>Classificação EVF</b>	<b>Série do curso</b>												<b>Total</b>
	<hr>
	Primeira		Segunda		Terceira		Quarta		Quinta		Sexta
	<hr>
	n	%	n	%	n	%	n	%	n	%	n	%	n	%
Excelente	1	0,2	1	0,2	0	0,0	3	0,7	2	0,5	2	0,5	9	2,1
Muito bom	38	8,8	23	5,3	45	10,4	26	6,0	25	5,8	11	2,5	168	38,8
Bom	39	9,0	39	9,0	55	12,7	29	6,7	18	4,2	9	2,1	189	43,6
Regular	19	4,4	22	5,1	15	3,5	1	0,2	5	1,2	4	0,9	66	15,2
Necessita melhorar	0	0,0	1	0,2	0	0,0	0	0,0	0	0,0	0	0,0	1	0,2
