# Supplementary material
Source: publisher figshare collection journal article supplement (https://scielo.figshare.com/articles/dataset/_/7591349)
Supplement: Supplementary file 3 [file Table_3.xls]

## Sheet: Table_3
<b>Itens da escala</b>		<b>Frequência absoluta (%)</b>
		<hr>
		0	1	2	3	4*	Total**
1	Tenho alguém para conversar	1	1	10	17	70	99
2	Dou e recebo afeto	1	2	12	21	63	98
3	Sou vigorosamente ativo	35	18	22	12	11	98
4	Sou moderadamente ativo	27	27	14	11	15	93
5	Como uma dieta balanceada	10	10	30	32	15	97
6	Excesso de açúcar, sal, gordura	16	15	33	24	10	98
7	Peso corporal saudável	12	5	11	18	55	100
8	Fumo cigarro	2	7	12	4	68	93
9	Uso drogas	21	0	0	0	74	95
10	Abuso de remédios	1	3	8	26	61	99
11	Bebo café, chá e colas	3	2	25	58	12	99
12	Consumo por semana	2	3	4	9	81	98
13	Consumo numa ocasião	1	15	38	25	20	99
14	Dirijo após beber	41	0	0	0	55	97
15	Durmo bem	12	12	37	26	13	100
16	Uso cinto de segurança	0	2	4	14	79	99
17	Sou capaz de lidar com meu estresse	4	7	27	40	21	99
18	Relaxo no tempo de lazer	9	13	34	24	19	100
19	Pratico sexo seguro	10	3	12	20	49	95
20	Apresento estar com pressa	26	26	32	11	3	99
21	Sinto-me com raiva e hostil	6	15	39	26	14	100
22	Penso de forma positiva	5	9	30	36	20	99
23	Sinto-me tenso e desapontado	8	20	44	20	8	100
24	Sinto-me triste e deprimido	5	12	35	32	16	100
25	Estou satisfeito com meu trabalho	2	8	20	36	32	99
